# Supplementary material
Source: PubMed Central journal article supplement (PMC4423373)
Supplement: supp_114.173815_FigureS1.pdf [file supp_114.173815_FigureS1.pdf]

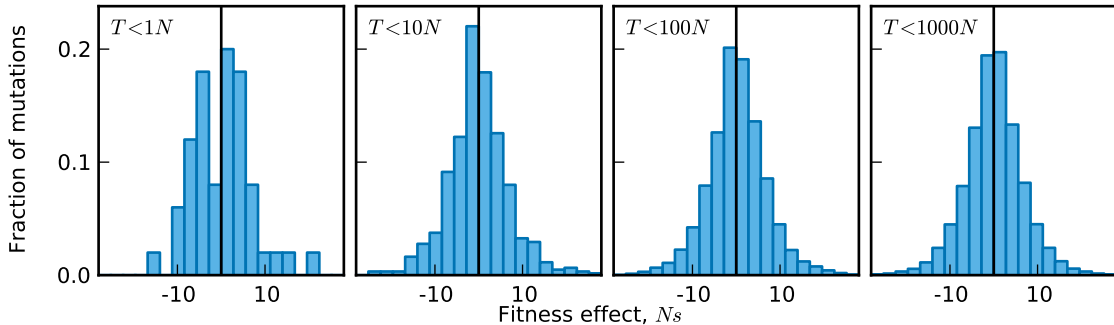

FIG. S1 The distribution of fixed effects over time in the example simulation shown in Fig. 2. Each panel shows the effects of all mutations fixed by time  $T$ . The  $T < 10N$  panel corresponds to Fig. 2B. To check for convergence to the steady state, we ran each set of simulations until the distribution of fixed effects was symmetric about zero.
