# Supplementary material
Source: PubMed Central journal article supplement (PMC4423373)
Supplement: supp_114.173815_FigureS2.pdf [file supp_114.173815_FigureS2.pdf]

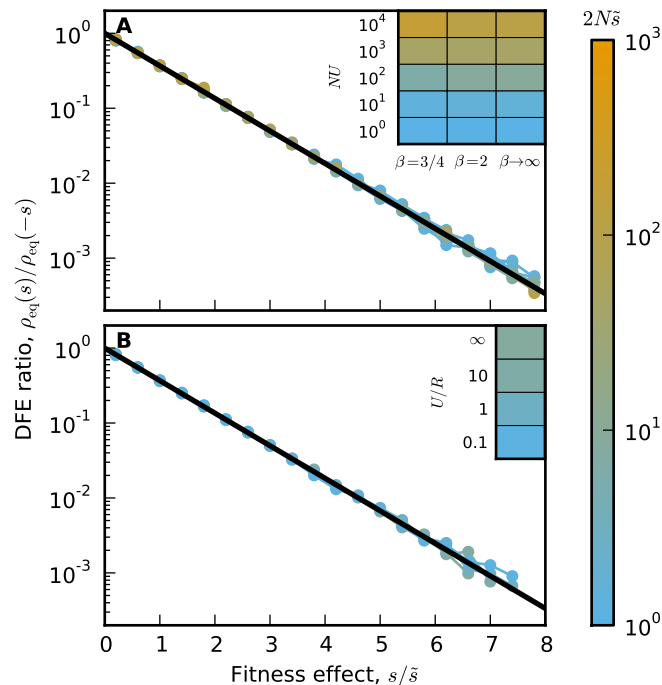

FIG. S2 The equilibrium DFE for different underlying DFEs and recombination rates. A) The equilibrium ratio of beneficial mutations to deleterious mutations for mutations with absolute effect  $|s|$ , averaged over 100 replicate simulations. We examined the effect of underlying DFEs in the stretched exponential family,  $\rho_0(|s|) \propto \exp[-(s/s_0)^\beta]$ . Specifically, we simulated heavy-tailed stretched exponential ( $\beta = 3/4$ ), half-Gaussian ( $\beta = 2$ ), and uniform ( $\beta \rightarrow \infty$ ) underlying DFEs.  $Ns_0 = 100$  for all simulations. B) The equilibrium DFE ratio in populations with recombination. As the recombination rate increases,  $2N\bar{s} \rightarrow 1$  as mutations begin to fix independently.  $NU = 100$ ,  $Ns_0 = 10$  for all simulations. We used FFPopsim (Zanini and Neher, 2012) to simulate recombining populations.

## REFERENCES

ZANINI, F. AND NEHER, R. A. 2012. FFPopSim: An efficient forward simulation package for the evolution of large populations. *Bioinformatics* 28:3332–3333.
